# Supplementary material for: Early transplantation-related mortality after allogeneic hematopoietic cell transplantation in patients with acute leukemia
Source: BMC Cancer. 2021 Feb 18;21:177. doi: 10.1186/s12885-021-07897-3 (PMC7891151; doi:10.1186/s12885-021-07897-3)
Supplement: Supplementary file 2 — Additional file 2. [file 12885_2021_7897_MOESM2_ESM.docx]

**Early transplantation-related mortality after allogeneic hematopoietic cell transplantation in patients with acute leukemia**

Seom Gim Kong1, Seri Jeong2, Sangjin Lee3, Jee-Yeong Jeong4,5, Da Jung Kim6, Ho Sup Lee6

1Department of Pediatrics, Kosin University College of Medicine, Busan, South Korea

2Department of Laboratory Medicine, Kangnam Sacred Heart Hospital, Hallym University College of Medicine, Seoul, South Korea

3Graduate School, Department of Statistics, Pusan National University, Busan, South Korea

4Department of Biochemistry, Kosin University College of Medicine, Busan, South Korea;

5Institute for Medical Science, Kosin University College of Medicine, Busan, South Korea;

6Department of Internal Medicine, Kosin University College of Medicine, Busan, South Korea

**Supplemental Table 1. Main causes of death within 50 days of allogeneic hematopoietic cell transplantation (N=151)**

| Causes of death | Death within 50 days (%) |
| --- | --- |
| Infection related | 101 (66.9) |
| Pneumonia | 66 (43.7) |
| Sepsis | 33 (21.9) |
| Other infection | 2 (1.3) |
| Organ failure | 25 (16.6) |
| Cardiac | 1 (0.7) |
| Liver | 4 (2.6) |
| Kidney | 11 (7.3) |
| Multi-organ failure | 9 (6.0) |
| Others* | 8 (5.3) |
| Unknown | 17 (11.3) |

***Others; causes of death including bleeding and graft versus host disease, etc.**
